# Supplementary figures and images for: Guanylate binding proteins directly attack Toxoplasma gondii via supramolecular complexes
Source: eLife journal article supplement (doi:10.7554/elife.11479), 2016-01-27

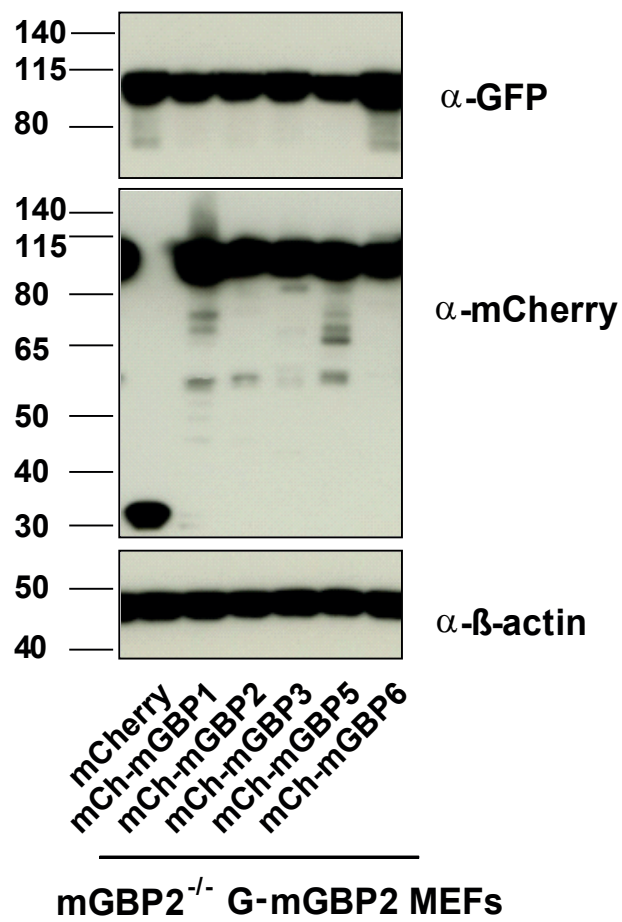

Supplement: supp [file elife-11479-supp-v1.zip]

a

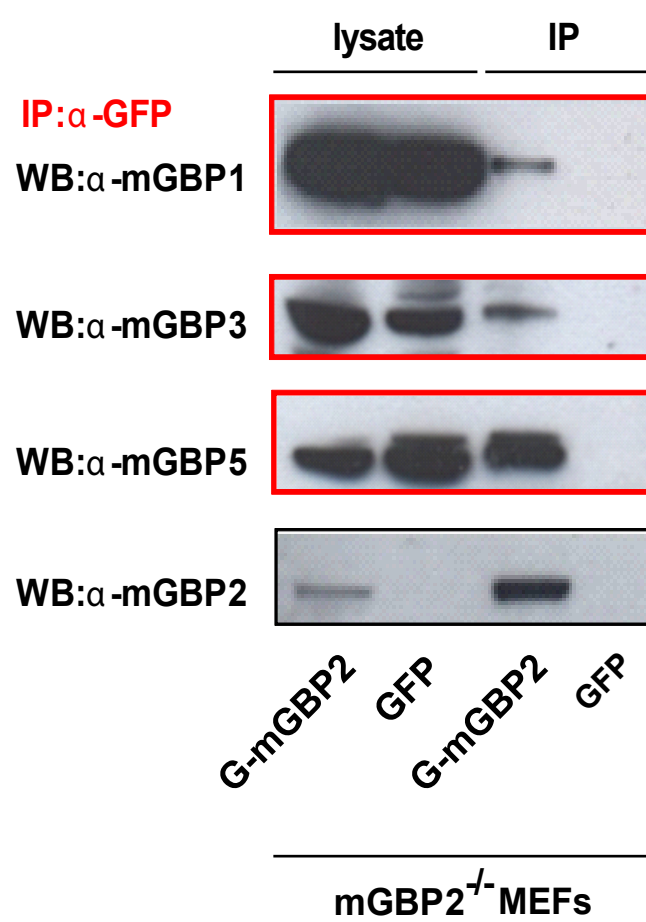

b

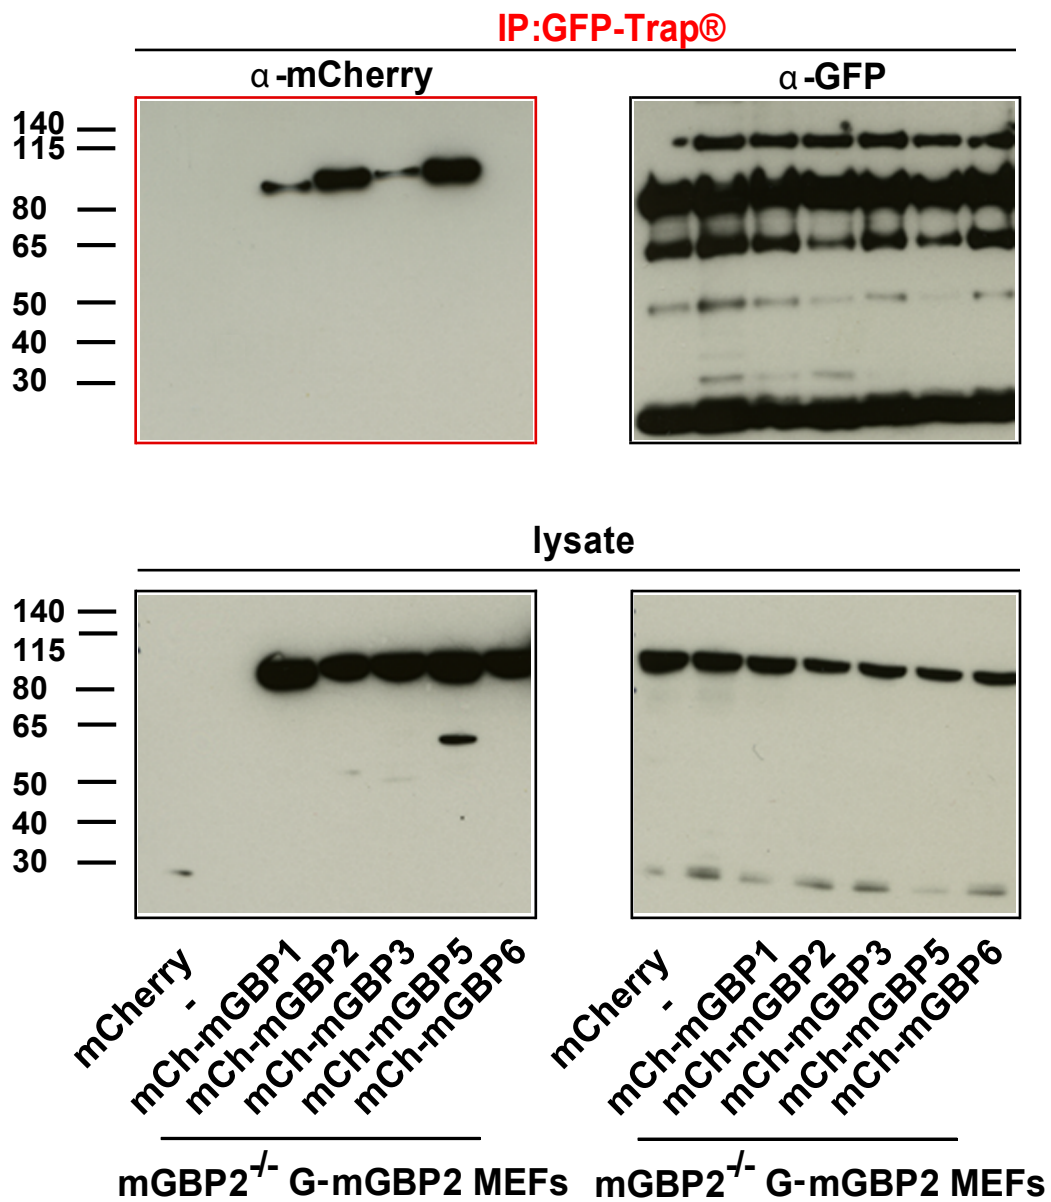

Supplement: supp [file elife-11479-supp-v1.zip]

**a**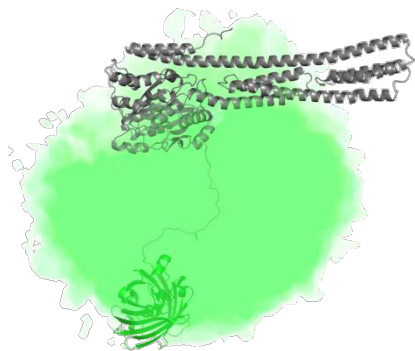**b**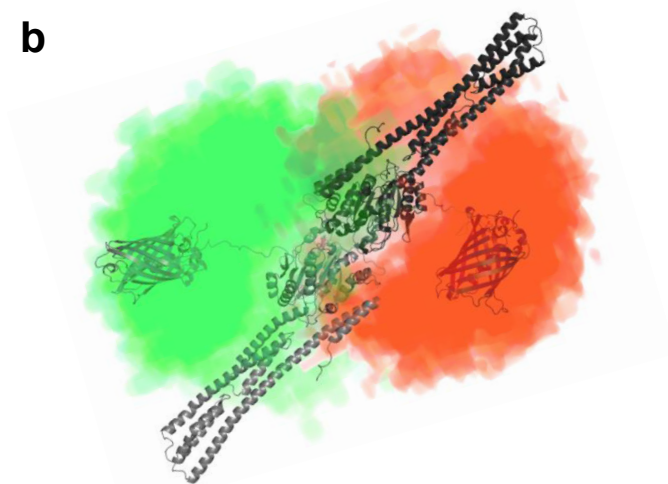**c**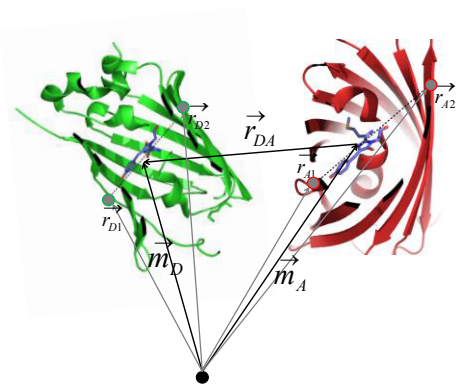**d**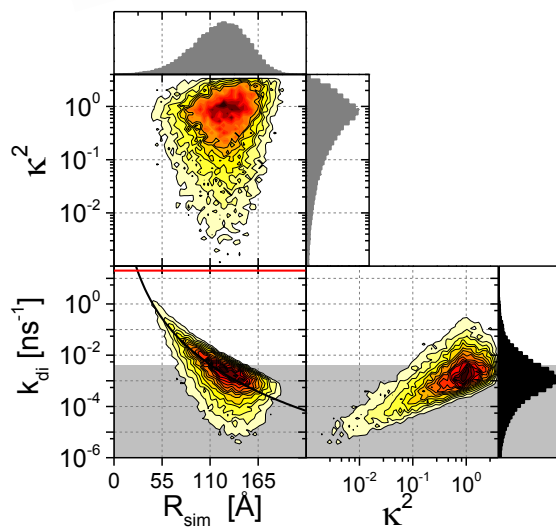**e**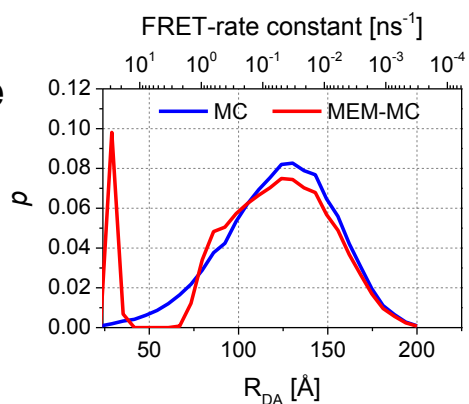**f**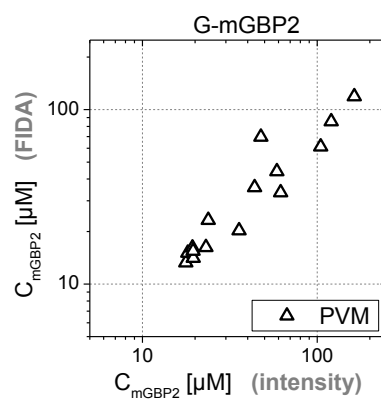**g**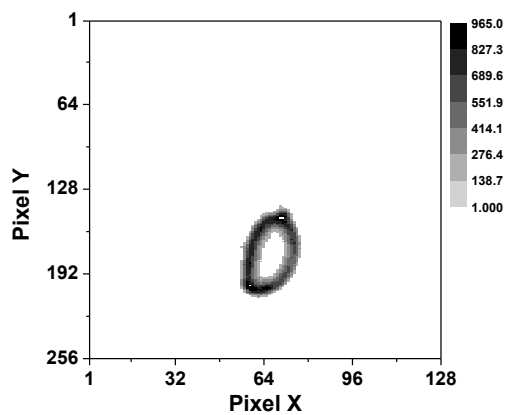**h**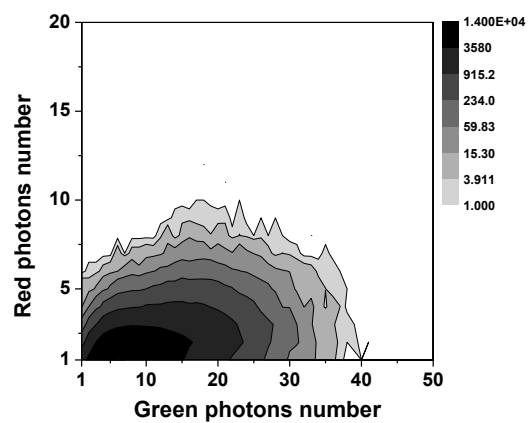

Supplement: supp [file elife-11479-supp-v1.zip]

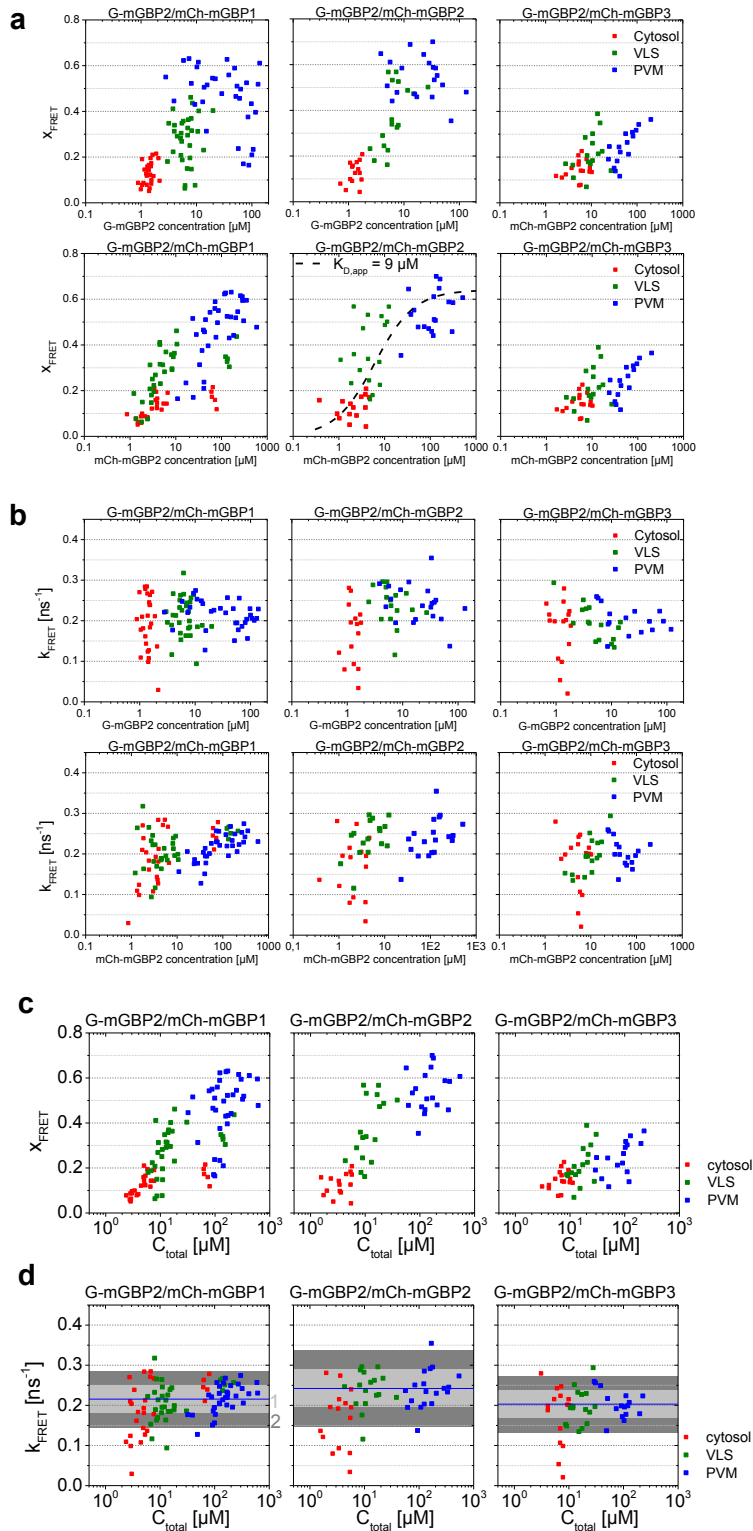

Supplement: supp [file elife-11479-supp-v1.zip]

a

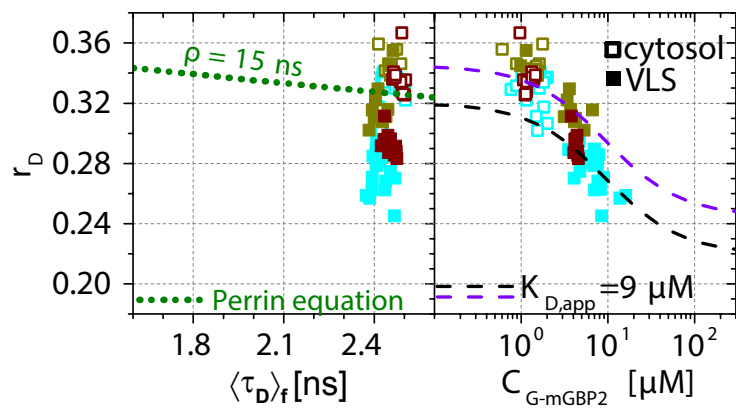

Color code:

G-mGBP2

G-mGBP2/mCh-mGBP1

G-mGBP2/mCh-mGBP2

G-mGBP2/mCh-mGBP3

G-mGBP2/mCh-mGBP5

G-mGBP2/mCh-mGBP6

b

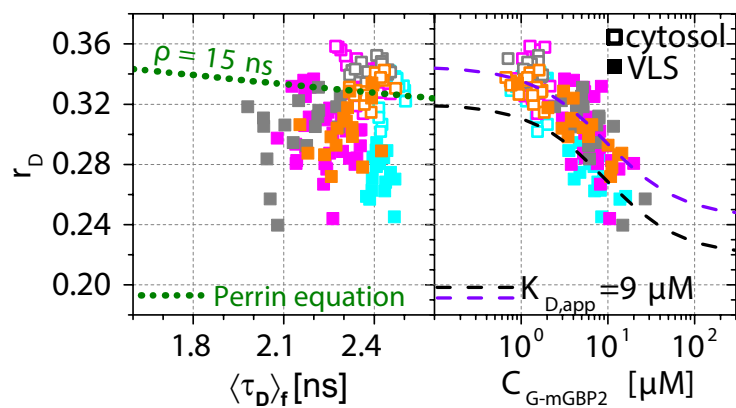

Supplement: supp [file elife-11479-supp-v1.zip]

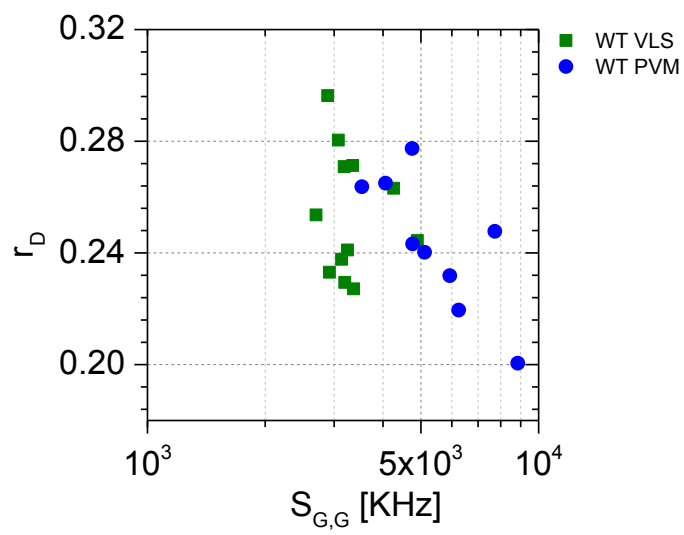

Supplement: supp [file elife-11479-supp-v1.zip]

a

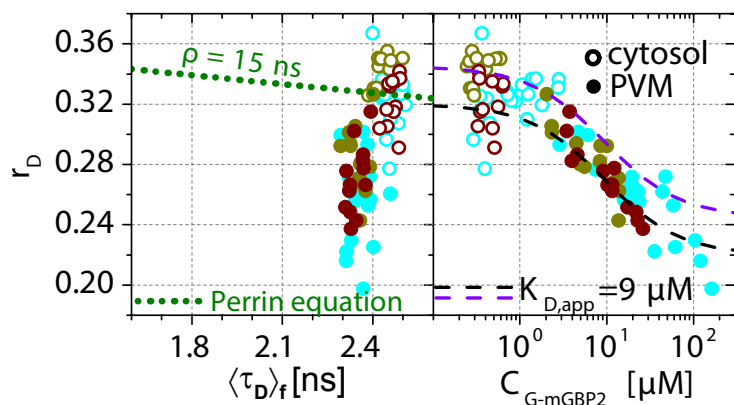

Color code:

G-mGBP2

G-mGBP2/mCh-mGBP1

G-mGBP2/mCh-mGBP2

G-mGBP2/mCh-mGBP3

G-mGBP2/mCh-mGBP5

G-mGBP2/mCh-mGBP6

b

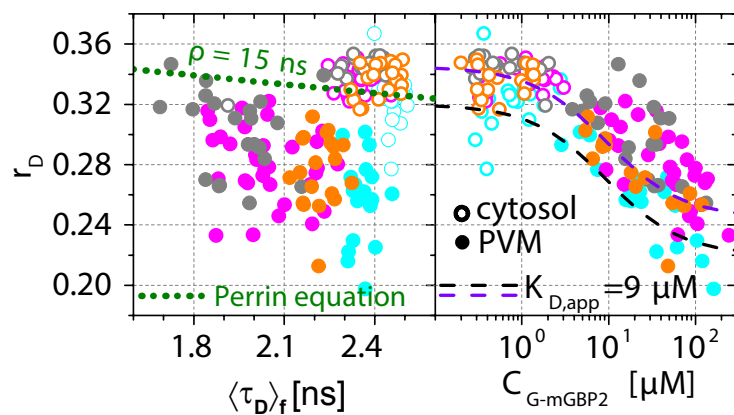

Supplement: supp [file elife-11479-supp-v1.zip]

**a**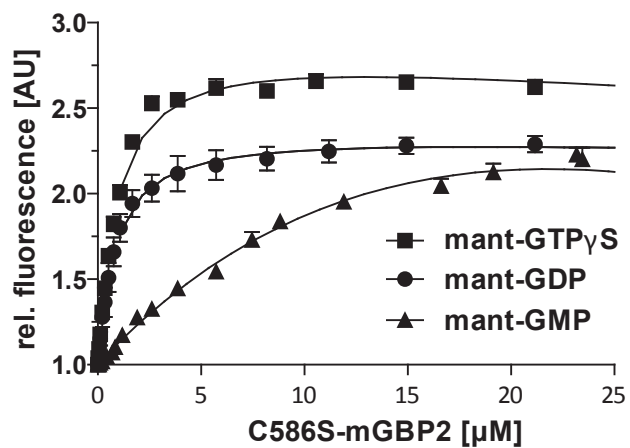**b**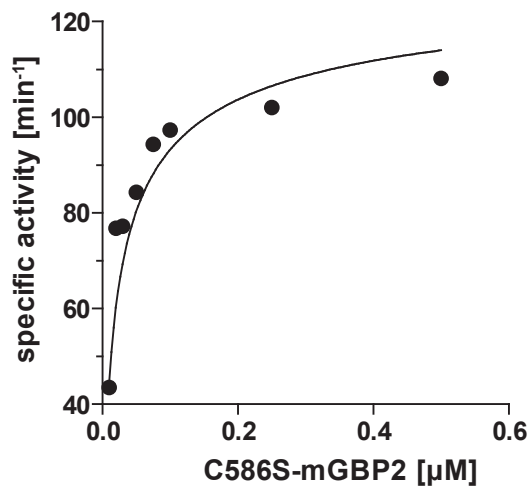**c**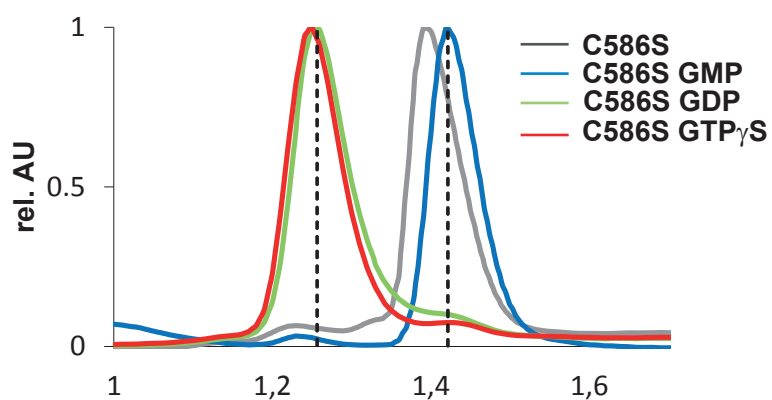**d**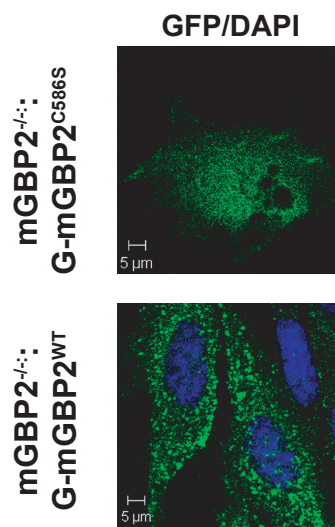

Supplement: supp [file elife-11479-supp-v1.zip]
